# Supplementary figures and images for: Discovering Functions of Unannotated Genes from a Transcriptome Survey of Wild Fungal Isolates
Source: PubMed Central journal article supplement — mBio. 2014 Apr 1;5(2):e01046-13. doi: 10.1128/mBio.01046-13 (PMC3977361; doi:10.1128/mbio.01046-13), 2014-04-01

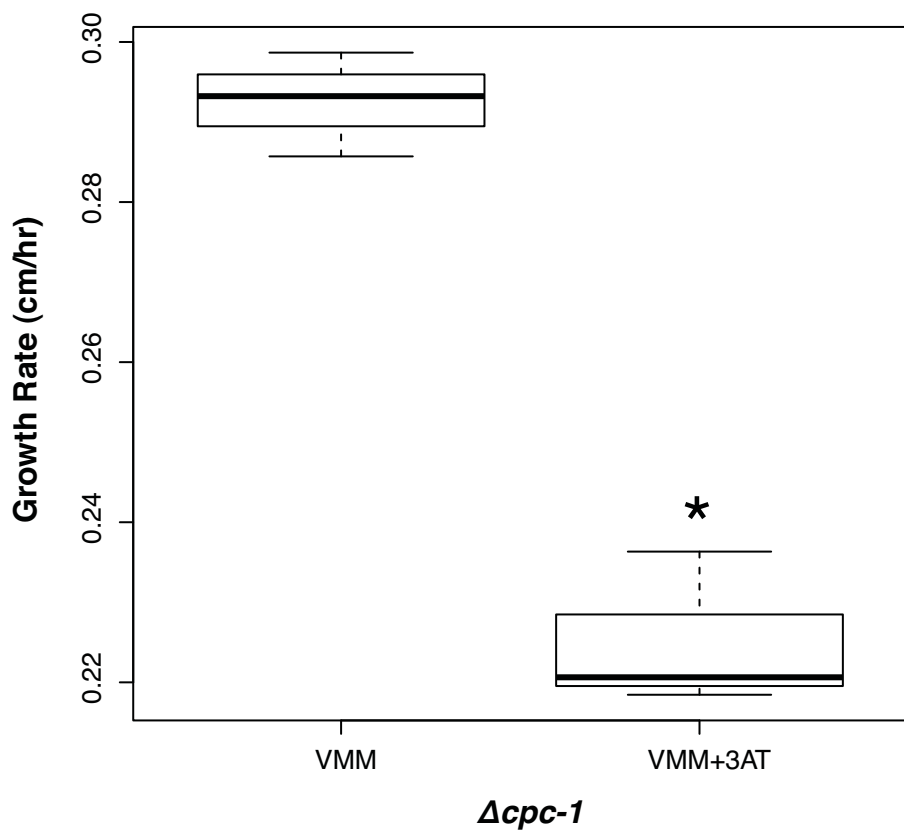

Supplement: mbo002141776sf02.pdf [file mbo002141776sf02.pdf]
